# Supplementary material
Source: MDPI journal article supplement (https://www.mdpi.com/1424-2818/9/3/25)
Supplement: s1 [file s1]

# Species Richness and Relative Abundance of Reef-Building Corals in the Indo-West Pacific

Lyndon DeVantier \* and Emre Turak

Coral Reef Research, 10 Benalla Rd., Oak Valley, Townsville 4810, QLD, Australia; emreturak@wanadoo.fr

\* Correspondence: Ldevantier@aol.com

**Table S1.** Species that are considered valid but which have various taxonomic or identification issues such that our abundance estimates are considered unreliable. See ‘Corals of the World’ [1] for additional taxonomic detail. j.s. – junior synonym.

| Species Name                                    | Issue                                                                                                                                                                                              |
|-------------------------------------------------|----------------------------------------------------------------------------------------------------------------------------------------------------------------------------------------------------|
| <i>Acanthophyllia deshayesiana</i>              | Considered a j.s. of <i>Cynarina lacrymalis</i> prior to recent acceptance. It was previously recorded as <i>Cynarina lacrymalis</i> .                                                             |
| <i>Acropora azurea</i>                          | An uncommon - rare species with main distribution range outside our study area, and with continuing taxonomic uncertainty. Type specimen has been considered a j.s. of <i>Acropora nana</i> [2, 3] |
| <i>Acropora forskali</i>                        | Taxonomic uncertainty – considered ‘unresolved’ [2] - under review                                                                                                                                 |
| <i>Acropora haimeii</i>                         | Taxonomic uncertainty – considered ‘unresolved’ [2] - under review                                                                                                                                 |
| <i>Acropora lamarcki</i>                        | Taxonomic uncertainty – type considered a j.s. of <i>Acropora subulata</i> [3] - under review                                                                                                      |
| <i>Acropora lianae</i>                          | Taxonomic uncertainty [1–4] - type considered similar to <i>A. humilis</i> group                                                                                                                   |
| <i>Acropora loisetteae</i>                      | Field identification issues - high similarity with some other open branching <i>Acropora</i> species                                                                                               |
| <i>Acropora mirabilis</i>                       | Identity unclear. Taxonomic uncertainty [1–4] – type considered similar to two other <i>Acropora</i> species - under review                                                                        |
| <i>Acropora natalensis</i>                      | Field identification issues – high similarity with <i>Acropora solitaryensis</i> [1–4]                                                                                                             |
| <i>Acropora ocellata</i>                        | Field identification issues and taxonomic uncertainty. Type considered a probable j.s. of <i>Acropora lutkeni</i> [1–4] - under review                                                             |
| <i>Acropora orbicularis</i>                     | Field identification issues and continuing taxonomic uncertainty – type considered j.s. of <i>Acropora clathrata</i> [1–4] - under review                                                          |
| <i>Acropora parahemprichii</i>                  | Field identification issues and continuing taxonomic uncertainty – type considered a j.s. of <i>Acropora austera</i> [1–4] - under review                                                          |
| <i>Acropora rosaria</i>                         | Taxonomic uncertainty [1–4] - species boundary issue with <i>Acropora loripes</i>                                                                                                                  |
| <i>Acropora rufus</i>                           | Field identification issues and taxonomic uncertainty – type was considered a j.s. of <i>Acropora variolosa</i> [1–4]                                                                              |
| <i>Acropora stoddarti</i>                       | Taxonomic uncertainty – type was considered a j.s. of <i>A. divaricata</i> [2] but was subsequently reinstated as valid [3]                                                                        |
| <i>Acropora tutuilensis</i>                     | Field identification issues and taxonomic uncertainty – type was considered a j.s. of <i>Acropora abrotanoides</i> [2] – under review                                                              |
| <i>Acropora variabilis</i>                      | Field identification issues and taxonomic uncertainty – type considered a j.s. of <i>Acropora valida</i> [2] – under review                                                                        |
| <i>Blastomussa wellsi</i> – <i>B. vivida</i>    | Our records also include, rarely, <i>Blastomussa vivida</i> , considered an ecomorph prior to description [5]                                                                                      |
| <i>Cyphastrea japonica</i>                      | Our records are in accord with ‘Corals of the World’ [1,4]. There are unresolved taxonomic issues with the type.                                                                                   |
| <i>Echinophyllia echinata</i> – <i>E. tarae</i> | Our records also include <i>Echinophyllia tarae</i> , considered an ecomorph prior to description [6]. It may be more common in the central eastern Pacific.                                       |
| <i>Fungia puishani</i>                          | Incorrectly synonymized with <i>Fungia fungites</i> [7], this rare and geographically restricted species is more similar to, though distinct from, <i>Fungia scabra</i>                            |

|                                                                         |                                                                                                                                                                                                                                                                                       |
|-------------------------------------------------------------------------|---------------------------------------------------------------------------------------------------------------------------------------------------------------------------------------------------------------------------------------------------------------------------------------|
| <i>Goniopora norfolkensis</i>                                           | Field identification issues - high similarity with other long-polyped <i>Goniopora</i>                                                                                                                                                                                                |
| <i>Heterocyathus aequicostatus</i> and <i>Heteropsammia cochlea</i>     | Lack of sampling in the preferred deep, sandy habitat.                                                                                                                                                                                                                                |
| <i>Leptoseris foliosa</i> – <i>Pachyseris inattesa</i>                  | Our Northern Red Sea ecoregion records also include <i>Pachyseris inattesa</i> , considered an ecomorph prior to description [8]                                                                                                                                                      |
| <i>Plerogyra sinuosa</i> – <i>P. cauliformis</i>                        | Our CT records also include <i>Plerogyra cauliformis</i> , considered an ecomorph prior to description [9]                                                                                                                                                                            |
| <i>Pocillopora damicornis</i> – <i>P. acuta</i> , <i>P. brevicornis</i> | Our records also include <i>Pocillopora acuta</i> and <i>P. brevicornis</i> , considered ecomorphs prior to reassessment [10]                                                                                                                                                         |
| <i>Podabacia motopurensis</i> – <i>P. kunzmanni</i>                     | Our records may also include <i>Podabacia kunzmanni</i> , prior to its description [11]                                                                                                                                                                                               |
| <i>Polycyathus chaishanensis</i>                                        | Our abundance estimate of this recently-described species is unreliable. It can be locally common in shallow turbid waters of the central IWP                                                                                                                                         |
| <i>Porites ornata</i>                                                   | Field identification issues - high similarity with other branching <i>Porites</i>                                                                                                                                                                                                     |
| <i>Psammocora digitata</i>                                              | Not included, because of taxonomic uncertainty between our prior interpretation [4] and more recent revision [1,12]                                                                                                                                                                   |
| <i>Psammocora haimiana</i>                                              | Our records may also include <i>Psammocora digitata</i> .                                                                                                                                                                                                                             |
| <i>Psammocora superficialis</i>                                         | We have retained this species, recognizing it consistently in the field, although it may require a new name because of taxonomic issues with the type [13]. Our records prior to 2006 may also include <i>Psammocora albopicta</i> , considered an ecomorph prior to description [13] |
| <i>Stylaraea punctata</i>                                               | This small cryptic species is absent from our dataset. It is very widespread and may be locally common, typically occurring under boulders on inner reef flats across the IWP                                                                                                         |

## References

1. Veron, J.E.N.; Stafford-Smith, M.G.; Turak, E.; DeVantier, L.M. Corals of the World; Version 0.01 Beta. Available online: <http://www.coralsoftheworld.org> (accessed on 11 April 2017).
2. Wallace, C.C. *Staghorn Corals of the World. A Revision of the Genus Acropora*; CSIRO Publishing: Collingwood, Australia, 1999; p. 422.
3. Wallace, C.C.; Done, B.J.; Muir, P.R. Revision and catalogue of worldwide staghorn corals *Acropora* and *Isopora* (Scleractinia: Acroporidae) in the Museum of Tropical Queensland. *Mem. Qld. Mus. Nat.* **2012**, *57*, 1–255.
4. Veron, J.E.N. *Corals of the World*; Australian Institute of Marine Science: Townsville, Australia, 2000; Volume 3, p. 1410.
5. Benzoni, F.; Arrigoni, R.; Waheed, Z.; Stefani, F.; Hoeksema, B.W. Phylogenetic relationships and revision of the genus *Blastomussa* (Cnidaria: Anthozoa: Scleractinia) with description of a new species. *Raffles Bull. Zool.* **2014**, *62*, 358–378.
6. Benzoni, F. *Echinophyllia tarae* sp. n. (Cnidaria, Anthozoa, Scleractinia), a new reef coral species from the Gambier Islands, French Polynesia. *ZooKeys* **2013**, *318*, 59–79.
7. Hoeksema, B. *Fungia puishani* Veron & DeVantier, 2000. Available online: <http://www.marinespecies.org/aphia.php?p=taxdetails&id=288855> (accessed on 12 April 2017).

8. Terraneo, T.I.; Berumen, M.L.; Arrigoni, R.; Waheed, Z.; Bouwmeester, J.; Caragnano, A.; Stefani, F.; Benzoni, F. *Pachyseris inattesa* sp. n. (Cnidaria, Anthozoa, Scleractinia): A new reef coral species from the Red Sea and its phylogenetic relationships. *ZooKeys* **2014**, *433*, 1–30.
9. Ditlev, H. New scleractinian corals (Cnidaria: Anthozoa) from Sabah, North Borneo. Description of one new genus and eight new species, with notes on their taxonomy and ecology. *Zool. Meded. Leiden* **2003**, *77*, 193–219.
10. Schmidt-Roach, S.; Lundgren, P.; Miller, K.J.; Gerlach, G.; Noreen, A.M.; Andreakis, N. Assessing hidden species diversity in the coral *Pocillopora damicornis* from eastern Australia. *Coral Reefs* **2013**, *32*, 161–172.
11. Hoeksema, B.W. Attached mushroom corals (Scleractinia: Fungiidae) in sediment-stressed reef conditions at Singapore, including a new species and a new record. *Raffles Bull. Zool.* **2009**, *22*, 81–90.
12. Benzoni, F.; Stefani, F.; Pichon, M.; Galli, P. The name game: Morpho-molecular species boundaries in the genus *Psammocora* (Cnidaria, Scleractinia). *Zool. J. Linn. Soc.* **2010**, *160*, 421–456.
13. Benzoni, F. *Psammocora albopicta* sp. nov., a new species of scleractinian coral from the Indo-West Pacific (Scleractinia; Siderastreidae). *Zootaxa* **2006**, *1358*, 49–57.
